# Supplementary material
Source: PubMed Central journal article supplement (PMC5643252)
Supplement: NIHMS905246-supplement-1.pdf [file NIHMS905246-supplement-1.pdf]

## Appendix A: Supplementary Data

### **Human OGG1 activity in nucleosomes is facilitated by transient unwrapping of DNA and is influenced by the local histone environment**

Katharina Bilotti<sup>a</sup>, Erin E. Kennedy<sup>b</sup>, Chuxuan Li<sup>a</sup>, Sarah Delaney<sup>a</sup>

Department of Chemistry<sup>a</sup> and Department of Molecular Biology, Cell Biology, and Biochemistry<sup>b</sup>, Brown University, Providence RI 02912

To whom correspondence should be addressed. Tel: +1 401 863 3590; Fax: +1 401 863 3590; Email: Sarah\_Delaney@brown.edu

#### **Contents**

**Supplementary Scheme 1.** Oligonucleotide sequences used in this work.

**Supplementary Data Fig. 1.** Mass spectra showing acetylation of H2B.

**Supplementary Data Fig. 2.** Representative native PAGE for evaluating the reconstitution of NCPs.

**Supplementary Data Fig. 3.** A representative denaturing PAGE showing the formation of product by UDG in a single turnover experiment.

## Scheme S1. Oligonucleotide sequences used in this work

The 145mer oligomers were synthesized as three component oligomers. Each strand was divided into a 45mer, a 40mer, and a 60mer, as indicated by the vertical lines. The component oligomers were assembled for ligation using the scaffolds listed. The table below details the base identity at locations X (lesion strand) or Y (complement strand) explored in this study.

145mer lesion strand (numbering based on “I strand” of Vasudevan *et. al.*)<sup>36</sup>

5'- ATC AGA ATC CCG GTG CCG X<sup>-54</sup>GX<sup>-52</sup> CCX<sup>-49</sup> CTC AAT TGG TCG TAG ACA  
GCT|CTA GCA CCG CTT AAA CGC ACG TAC GCG CTG TCC CCC GCG T|TT TAA CCG  
CCA AGG GGA TTA CTC CCT AGT CTC CAG GCA CGT GTC AGA TAT ATA CAT CGA T -  
3'

Scaffold 1:

5'- TTT AAG CGG TGC TAG AGC TGT CTA CGA CCA -3'

Scaffold 2:

5'- CCC TTG GCG GTT AAA ACG CGG GGG ACA GCG -3'

145mer complement strand (numbering based on “J strand” of Vasudevan *et. al.*)<sup>36</sup>

5'- ATC GAT GTA TAT ATC TGA CAC GTG CCT GGA GAC TAG GGA GTA ATC|CCC TTG  
GCG GTT AAA ACG CGG GGG ACA GCG CGT ACG TGC G|TT TAA GCG GTG CTA GAG  
CTG TCT ACG ACC AAT TGA GY<sup>+49</sup>G GY<sup>+52</sup>C Y<sup>+54</sup>CG GCA CCG GGA TTC TGA T -3'

Scaffold 3:

5'- TTT AAC CGC CAA GGG GAT TAC TCC CTA GTC -3'

Scaffold 4:

5'- CTA GCA CCG CTT AAA CGC ACG TAC GCG CTG -3'

| Substrate             | X <sup>-49</sup> | Y <sup>+49</sup> | X <sup>-52</sup> | Y <sup>+52</sup> | X <sup>-54</sup> | Y <sup>+54</sup> |
|-----------------------|------------------|------------------|------------------|------------------|------------------|------------------|
| 8-oxoG <sup>OUT</sup> | 8-oxoG           | C                | G                | C                | G                | C                |
| 8-oxoG <sup>MID</sup> | G                | C                | 8-oxoG           | C                | G                | C                |
| 8-oxoG <sup>IN</sup>  | G                | C                | G                | C                | 8-oxoG           | C                |
| U <sup>OUT</sup>      | U                | G                | C                | G                | C                | G                |
| U <sup>MID</sup>      | C                | G                | U                | G                | C                | G                |
| U <sup>IN</sup>       | C                | G                | C                | G                | U                | G                |

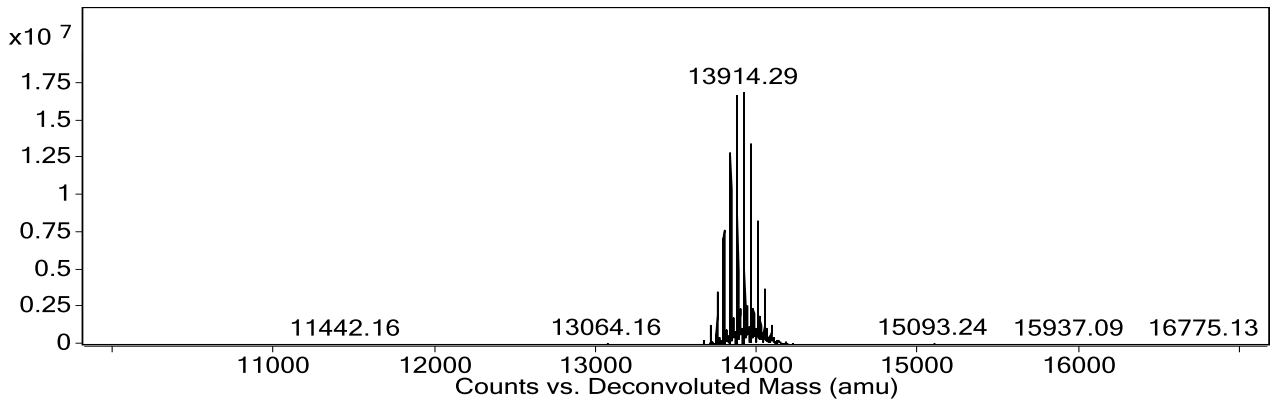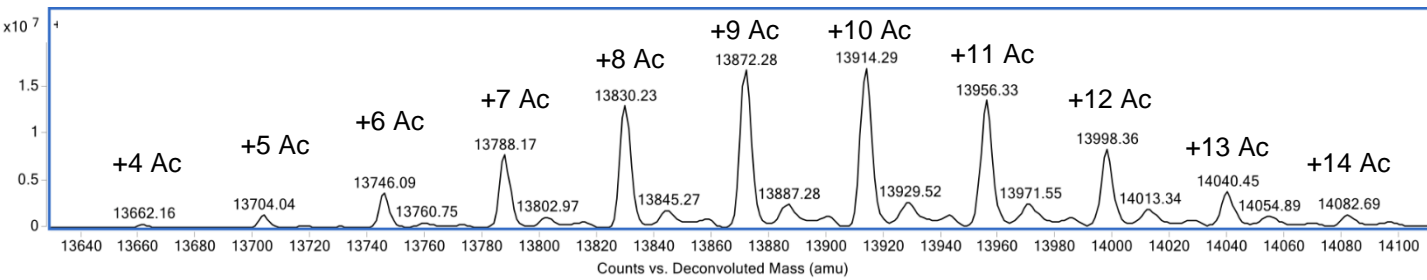

**Supplementary Data Fig. 1.** Electrospray ionization mass spectrometry was used to evaluate the acetylation of H2B. **(A)** Mass spectrometry reveals H2B acetylation. The peak at 13914.29 amu corresponds to the addition of 10 acetyl groups. **(B)** A zoomed in view of the mass spectra reveals a distribution in the number of acetyl group added. Peaks corresponding to the addition of 4-14 acetyl groups were observed.

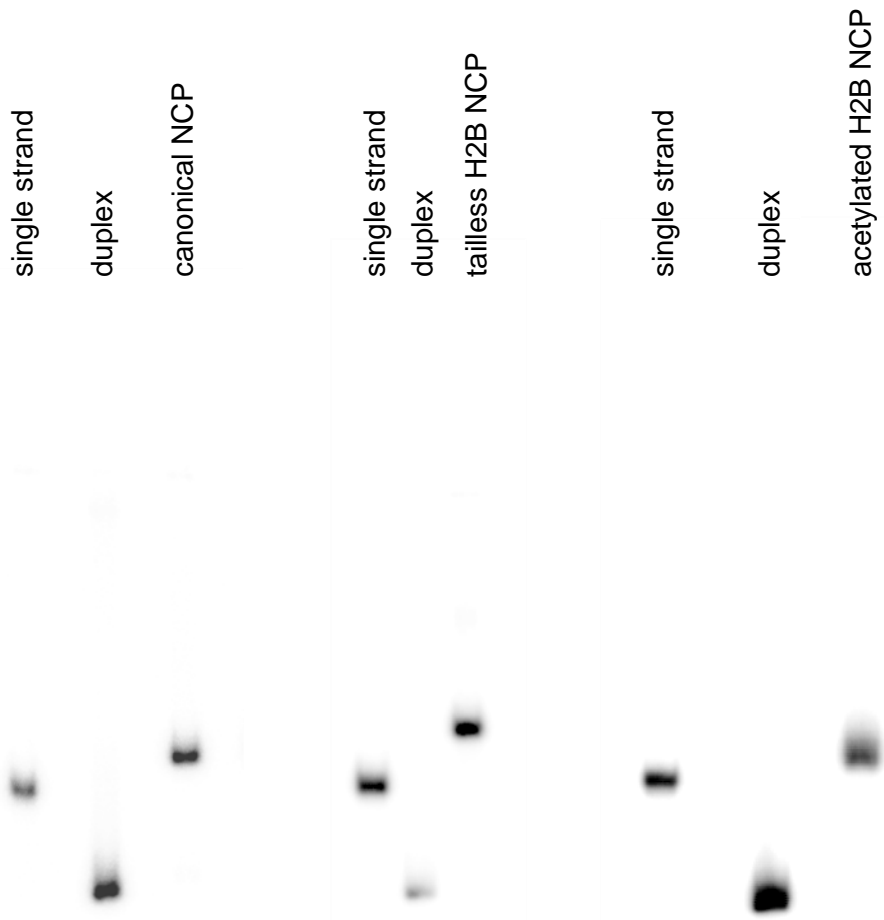

**Supplementary Data Fig. 2.** Representative native PAGE for evaluating the reconstitution of canonical, tailless H2B, and acetylated H2B NCPs. Radiolabeled samples were loaded on a 1 mm thick 7% native gel (60:1 acrylamide:bisacrylamide, 0.25X TBE). The gel was run at 4°C for 3 hours at 150 V. Variable migration distances are observed for single strand, duplex, and NCP-incorporated DNA samples.

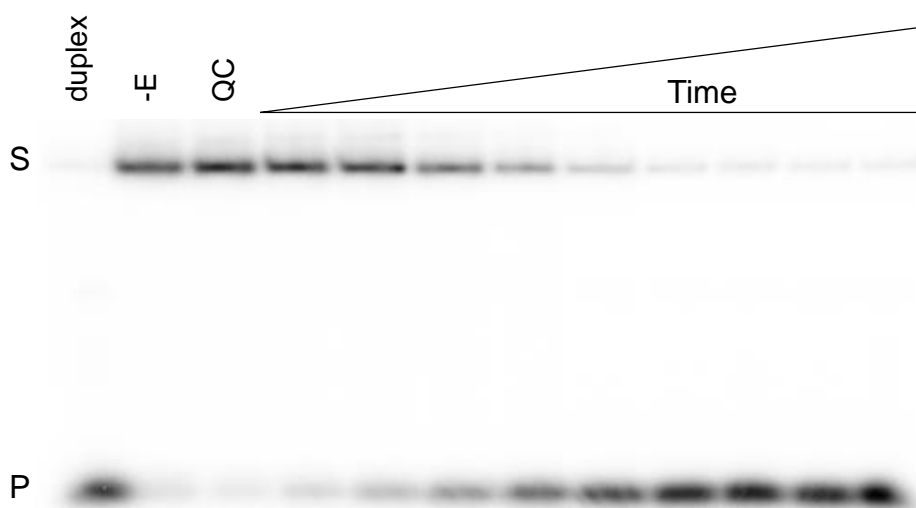

**Supplementary Data Fig. 3.** A representative denaturing PAGE showing the formation of product by UDG in a single turnover experiment. The reaction buffer used in all glycosylase kinetics experiments was 20 mM Tris-HCl (pH 7.6), 25 mM NaCl, 75 mM KCl, 1 mM EDTA, 1 mM DTT, 200  $\mu$ g/ml BSA. The conversion of the lesion containing NCP substrates (S) to nicked product (P) is observed with increasing time. A positive control of UDG acting on free duplex (“duplex” lane) is included to verify the activity of UDG. The “-E” lane is a negative control prepared by incubating the NCP substrate in the absence of UDG at 37 °C for the duration of the longest time point. The “QC” lane is a second negative control that was prepared by adding 1 M NaOH quench (16  $\mu$ L) to substrate (8  $\mu$ L) followed by addition of UDG (8  $\mu$ L) before incubation at 37 °C for the duration of the longest time point. As NaOH prevents glycosylase activity, this control serves to reveal any pre-existing damage or incidental damage. Radiolabeled samples were loaded on a 0.4 mm thick 8% denaturing sequencing gel. The gel was run for 45 min at 80 W to achieve adequate separation of substrate and product. The bands corresponding to substrate and product were quantified using densitometry.
